# Supplementary material
Source: MDPI journal article supplement (https://www.mdpi.com/2072-4292/14/16/4027)
Supplement: s1 [file s1]

## Supplementary Materials

**Table S1.** Site characteristics of the PhenoCam Network and Phenology Eye Network sites used in this study. Vegetation types are as follows: DB = deciduous broadleaf; DN = deciduous needleleaf; GR = grassland; MX = mixed vegetation; SH = shrubs; TN = tundra; WL = wetland.

| Camera Name      | Full Site Name                                                              | Latitude (°) | Longitude (°) | Elevation (m) | Vegetation Type |
|------------------|-----------------------------------------------------------------------------|--------------|---------------|---------------|-----------------|
| acadia           | Acadia National Park, McFarland Hill, near Bar Harbor, Maine                | 44.377       | -68.261       | 158           | DB              |
| ahwahnee         | Ahwahnee Meadow, Yosemite National Park, California                         | 37.747       | -119.582      | 1199          | GR              |
| alligatorriver   | Alligator River National Wildlife Refuge, North Carolina                    | 35.788       | -75.904       | 1             | DB              |
| arbutuslakeinlet | Arbutus Lake Inlet Tower, Huntington Wildlife Forest, Newcomb, New York     | 43.993       | -74.245       | 527           | DB              |
| ashburnham       | Ashburnham State Forest / Overlook Middle School, Ashburnham, Massachusetts | 42.603       | -71.926       | 292           | DB              |
| asuhighlands     | Appalachian State University, Boone, NC                                     | 36.208       | -81.703       | 1016          | DB              |
| bartlettir       | Bartlett Experimental Forest, Bartlett, New Hampshire                       | 44.065       | -71.288       | 268           | DB              |
| bbc1             | Hardwood Walk-up Tower, Harvard Forest, Petersham, Massachusetts            | 42.535       | -72.174       | 362           | DB              |
| bbc2             | LPH Tower, Harvard Forest, Petersham, Massachusetts                         | 42.542       | -72.185       | 380           | DB              |
| bbc7             | Bartlett Experimental Forest, Bartlett, New Hampshire                       | 44.065       | -71.288       | 289           | DB              |
| bitterrootvalley | Bitterroot Valley, Stephenville, Montana                                    | 46.507       | -114.091      | 1017          | DB              |
| boundarywaters   | Boundary Waters Canoe Area Wilderness, Superior National Forest, Minnesota  | 47.947       | -91.496       | 519           | DB              |

|                  |                                                                                                     |        |          |      |    |
|------------------|-----------------------------------------------------------------------------------------------------|--------|----------|------|----|
| butte            | Continental Divide, Butte, Montana                                                                  | 45.953 | -112.480 | 1682 | GR |
| caryinstitute    | Cary Institute of Ecosystem Studies, Millbrook, NY                                                  | 41.784 | -73.734  | 127  | DB |
| coweeta          | Coweeta Hydrologic Laboratory, USDA Forest Service, Southern Research Station, Otto, North Carolina | 35.059 | -83.428  | 680  | DB |
| cperagm          | CPER Adaptive Grazing Management                                                                    | 40.840 | -104.767 | 1644 | GR |
| downerwoods      | UW-Milwaukee Field Station, Downer Woods Natural Area, Milwaukee, Wisconsin                         | 43.079 | -87.881  | 213  | DB |
| dukehw           | Hardwood Stand, Duke Forest, North Carolina                                                         | 35.974 | -79.100  | 400  | DB |
| grandteton       | Grand Teton National Park, Wyoming                                                                  | 43.915 | -110.578 | 2054 | SH |
| greenridge1      | Green Ridge State Forest, Maryland USA                                                              | 39.691 | -78.407  | 285  | DB |
| harvard          | EMS Tower, Harvard Forest, Petersham, Massachusetts                                                 | 42.538 | -72.172  | 340  | DB |
| harvardbarn      | Barn Tower, Camera 1, Harvard Forest, Petersham, Massachusetts                                      | 42.535 | -72.190  | 350  | DB |
| harvardblo       | Below-canopy camera, EMS Tower, Harvard Forest, Petersham, Massachusetts                            | 42.538 | -72.172  | 340  | DB |
| harvardhemlock   | Hemlock Tower, Harvard Forest, Petersham, Massachusetts                                             | 42.539 | -72.180  | 355  | DB |
| harvardlph       | LPH Tower, Harvard Forest, Petersham, Massachusetts                                                 | 42.542 | -72.185  | 380  | DB |
| hubbardbrooksfws | South Facing Watersheds, Hubbard Brook Experimental Forest, Thornton, New Hampshire                 | 43.927 | -71.741  | 650  | DB |

|                       |                                                                           |        |          |      |    |
|-----------------------|---------------------------------------------------------------------------|--------|----------|------|----|
| imcrkridge0           | Imnavait Creek Ridge,<br>camera-0, AON IC_1991,<br>Alaska                 | 68.607 | -149.296 | 951  | TN |
| imcrkridge1           | Imnavait Creek Ridge,<br>camera-1, AON IC_1991,<br>Alaska                 | 68.607 | -149.296 | 951  | TN |
| innsbruck             | Neustift Field Site, Stubai<br>Valley, Tyrol, Austria                     | 47.116 | 11.320   | 972  | GR |
| joycekilmer           | Joyce Kilmer Slickrock<br>Wilderness, North Carolina                      | 35.257 | -83.795  | 1373 | DB |
| juncabalejo           | Middle of Doñana marshes,<br>Spain                                        | 36.936 | -6.378   | 1    | WL |
| kansas                | KU Field Station, University<br>of Kansas, Kansas                         | 39.056 | -95.191  | 333  | GR |
| konza                 | Konza Prairie Biological<br>Station, Kansas State<br>University, Kansas   | 39.082 | -96.560  | 443  | GR |
| lacclair              | Lac Clair, Quebec, Canada                                                 | 46.952 | -71.670  | 313  | DB |
| lethbridge            | Lethbridge Grassland<br>Ecosystem Site, Lethbridge,<br>Alberta            | 49.709 | -112.940 | 950  | GR |
| lostcreek             | Lost Creek, Wisconsin                                                     | 46.083 | -89.979  | 480  | WL |
| macleish              | Canopy forest, MacLeish<br>Field Station, Whately,<br>Massachusetts       | 42.448 | -72.680  | 251  | DB |
| mammothcave           | Environmental Learning<br>Center, Mammoth Cave<br>National Park, Kentucky | 37.186 | -86.102  | 226  | DB |
| marcell               | Marcell Experimental Forest,<br>Minnesota                                 | 47.514 | -93.469  | 422  | DB |
| montebondone<br>grass | Monte Bondone grassland<br>FLUXNET site, Monte<br>Bondone, Italy          | 46.015 | 11.046   | 1550 | GR |
| montebondone<br>peat  | Monte Bondone peatland<br>site, Monte Bondone, Italy                      | 46.018 | 11.041   | 1563 | WL |
| morganmonroe          | Morgan Monroe State Forest,<br>Indiana                                    | 39.323 | -86.413  | 275  | DB |
| morganmonroe<br>2     | Morgan Monroe State Forest,<br>Indiana                                    | 39.323 | -86.413  | 275  | DB |

|                                 |                                                                                                           |        |          |      |    |
|---------------------------------|-----------------------------------------------------------------------------------------------------------|--------|----------|------|----|
| nationalcapital                 | Park Police Headquarters,<br>National Capital Parks,<br>Washington DC                                     | 38.888 | -77.069  | 28   | DB |
| nationalelkre<br>fuge           | National Elk Refuge,<br>Wyoming                                                                           | 43.489 | -110.738 | 1899 | GR |
| ncssm                           | North Carolina School of<br>Science and Mathematics,<br>Durham, North Carolina                            | 36.018 | -78.921  | 175  | DB |
| NEON.D01.H<br>ARV.DP1.0003<br>3 | NEON Site - D01<br>(Northeast) Harvard Forest,<br>Massachusetts - tower top                               | 42.537 | -72.173  | 359  | DB |
| NEON.D01.H<br>ARV.DP1.0004<br>2 | NEON Site - D01<br>(Northeast) Harvard Forest,<br>Massachusetts - mid-tower                               | 42.537 | -72.173  | 359  | DB |
| NEON.D02.BL<br>AN.DP1.00033     | NEON Site - D02 (Mid-<br>Atlantic) Blandy<br>Experimental Farm, Virginia<br>- tower top                   | 39.034 | -78.042  | 162  | DB |
| NEON.D02.SC<br>BL.DP1.00033     | NEON Site - D02 (Mid-<br>Atlantic) Smithsonian<br>Conservation Biology<br>Institute, Virginia - tower top | 38.893 | -78.139  | 364  | DB |
| NEON.D03.JE<br>RC.DP1.00033     | NEON Site - D03<br>(Southeast) Jones Ecological<br>Research Center, Georgia -<br>tower top                | 31.195 | -84.469  | 58   | DB |
| NEON.D03.JE<br>RC.DP1.00042     | NEON Site - D03<br>(Southeast) Jones Ecological<br>Research Center, Georgia -<br>mid-tower                | 31.195 | -84.469  | 58   | DB |
| NEON.D05.TR<br>EE.DP1.00033     | NEON Site - D05 (Great<br>Lakes) Treehaven,<br>Wisconsin - tower top                                      | 45.494 | -89.586  | 474  | DB |
| NEON.D05.TR<br>EE.DP1.00042     | NEON Site - D05 (Great<br>Lakes) Treehaven,<br>Wisconsin - mid-tower                                      | 45.494 | -89.586  | 474  | DB |
| NEON.D05.U<br>NDE.DP1.0003<br>3 | NEON Site - D05 (Great<br>Lakes) UNDERC, Michigan<br>- tower top                                          | 46.234 | -89.537  | 529  | DB |

|                                 |                                                                                                                  |        |         |      |    |
|---------------------------------|------------------------------------------------------------------------------------------------------------------|--------|---------|------|----|
| NEON.D06.KI<br>NG.DP1.20002     | NEON Site - D06 (Prairie Peninsula) Kings Creek, Kansas - aquatic/stream-gauge camera                            | 39.105 | -96.603 | 339  | WL |
| NEON.D06.K<br>ONZ.DP1.0003<br>3 | NEON Site - D06 (Prairie Peninsula) Konza Prairie Biological Station, Kansas - top-of-tower camera               | 39.101 | -96.563 | 415  | GR |
| NEON.D06.K<br>ONZ.DP1.0004<br>2 | NEON Site - D06 (Prairie Peninsula) Konza Prairie Biological Station, Kansas - mid-tower camera                  | 39.101 | -96.563 | 415  | GR |
| NEON.D07.GR<br>SM.DP1.00033     | NEON Site - D07 (Appalachians and Cumberland Plateau) Great Smoky Mountains National Park, Tennessee - tower top | 35.689 | -83.502 | 589  | DB |
| NEON.D07.GR<br>SM.DP1.00042     | NEON Site - D07 (Appalachians and Cumberland Plateau) Great Smoky Mountains National Park, Tennessee - mid-tower | 35.689 | -83.502 | 589  | DN |
| NEON.D07.M<br>LBS.DP1.0003<br>3 | NEON Site - D07 (Appalachians and Cumberland Plateau) Mountain Lake Biological Station, Virginia - tower top     | 37.378 | -80.525 | 1177 | DB |
| NEON.D07.OR<br>NL.DP1.00033     | NEON Site - D07 (Appalachians and Cumberland Plateau) Oak Ridge, Tennessee - tower top                           | 35.964 | -84.283 | 351  | DB |
| NEON.D07.OR<br>NL.DP1.00042     | NEON Site - D07 (Appalachians and Cumberland Plateau) Oak Ridge, Tennessee - mid-tower                           | 35.964 | -84.283 | 351  | DB |
| NEON.D07.W<br>ALK.DP1.2000<br>2 | NEON Site - D07 (Appalachians &                                                                                  | 35.959 | -84.280 | 274  | WL |

|                                 |                                                                                                                 |        |          |      |    |
|---------------------------------|-----------------------------------------------------------------------------------------------------------------|--------|----------|------|----|
|                                 | Cumberland Plateau) Walker Ranch, TN                                                                            |        |          |      |    |
| NEON.D08.DE<br>LA.DP1.00033     | NEON Site - D08 (Ozarks Complex) Dead Lake, Alabama - tower top                                                 | 32.542 | -87.804  | 36   | DB |
| NEON.D08.LE<br>NO.DP1.00033     | NEON Site - D08 (Ozarks Complex) Lenoir Landing, AL - top of tower                                              | 31.854 | -88.161  | 10   | DB |
| NEON.D09.DC<br>FS.DP1.00033     | NEON Site - D09 (Northern Plains) Dakota Coteau Field School, North Dakota - top-of-tower camera                | 47.162 | -99.107  | 574  | GR |
| NEON.D09.DC<br>FS.DP1.00042     | NEON Site - D09 (Northern Plains) Dakota Coteau Field School, North Dakota - mid-tower camera                   | 47.162 | -99.107  | 574  | GR |
| NEON.D09.N<br>OGP.DP1.0003<br>3 | NEON Site - D09 (Northern Plains) Northern Great Plains Research Laboratory, North Dakota - top-of-tower camera | 46.770 | -100.915 | 589  | GR |
| NEON.D09.N<br>OGP.DP1.0004<br>2 | NEON Site - D09 (Northern Plains) Northern Great Plains Research Laboratory, North Dakota - mid-tower camera    | 46.770 | -100.915 | 589  | GR |
| NEON.D09.PR<br>PO.DP1.20002     | NEON Site - D09 (Northern Plains) Prairie Pothole, North Dakota -                                               | 47.130 | -99.251  | 587  | WL |
| NEON.D09.W<br>OOD.DP1.000<br>33 | NEON Site - D09 (Northern Plains) Woodworth, North Dakota - tower top                                           | 47.128 | -99.241  | 585  | GR |
| NEON.D10.AR<br>IK.DP1.20002     | NEON Site - D10 (Central Plains) Arikaree River Colorado                                                        | 39.758 | -102.447 | 1188 | GR |
| NEON.D10.CP<br>ER.DP1.00033     | NEON Site - D10 (Central Plains) Central Plains Experimental Range, Nunn, CO top                                | 40.816 | -104.746 | 1600 | GR |

|                                 |                                                                                                                     |        |          |      |    |
|---------------------------------|---------------------------------------------------------------------------------------------------------------------|--------|----------|------|----|
| NEON.D11.CL<br>BJ.DP1.00033     | NEON Site - D11 (Southern Plains) LBJ National Grassland, Texas - tower top                                         | 33.401 | -97.570  | 279  | DB |
| NEON.D11.O<br>AES.DP1.0003<br>3 | NEON Site - D11 (Southern Plains) Klemme Range Research Station, Oklahoma - top-of-tower camera                     | 35.411 | -99.059  | 520  | GR |
| NEON.D13.NI<br>WO.DP1.0003<br>3 | NEON Site - D13 (Southern Rockies and Colorado Plateau) Niwot Ridge Mountain Research Station, Colorado - tower top | 40.054 | -105.582 | 3493 | TN |
| NEON.D13.NI<br>WO.DP1.0004<br>2 | NEON Site - D13 (Southern Rockies and Colorado Plateau) Niwot Ridge Mountain Research Station, Colorado - mid-tower | 40.054 | -105.582 | 3493 | TN |
| NEON.D18.TO<br>OL.DP1.00033     | NEON Site - D18 (Tundra) Toolik, Alaska - tower top                                                                 | 68.661 | -149.370 | 827  | TN |
| NEON.D18.TO<br>OL.DP1.00042     | NEON Site - D18 (Tundra) Toolik, Alaska - mid-tower                                                                 | 68.661 | -149.370 | 827  | TN |
| northattleboro<br>ma            | North Attleboro High School, North Attleboro, Massachusetts                                                         | 41.984 | -71.311  | 60   | DB |
| oakville                        | Oakville Prairie, North Dakota                                                                                      | 47.899 | -97.316  | 268  | GR |
| proctor                         | University of Vermont, Proctor Maple Research Center, Underhill, Vermont                                            | 44.525 | -72.866  | 403  | DB |
| queens                          | Queen's University Biological Station, Lake Opinicon, Ontario, Canada                                               | 44.565 | -76.324  | 126  | DB |
| readingma                       | Austin Prep School, Reading, Massachusetts                                                                          | 42.530 | -71.127  | 100  | DB |
| robinson                        | Fire Tower, Robinson Forest, Kentucky                                                                               | 37.467 | -83.158  | 483  | DB |
| robinson2                       | Fire Tower (Facing West), Robinson Forest, Kentucky                                                                 | 37.467 | -83.158  | 483  | DB |

|                    |                                                                                 |        |         |      |    |
|--------------------|---------------------------------------------------------------------------------|--------|---------|------|----|
| russellsage        | Russell Sage State Wildlife Management Area, near Monroe, Louisiana             | 32.457 | -91.974 | 20   | DB |
| sanford            | Sanford Natural Area, Michigan State University, East Lansing, Michigan         | 42.727 | -84.464 | 268  | DB |
| shiningrock        | Shining Rock Wilderness, Blue Ridge Parkway National Park, North Carolina       | 35.390 | -82.775 | 1500 | DB |
| smokylook          | Look Rock, Great Smoky National Park, Tennessee                                 | 35.633 | -83.943 | 801  | DB |
| springfieldma      | Academy Hill School, Springfield, Massachusetts                                 | 42.135 | -72.586 | 56   | DB |
| spruceA0EMT        | SPRUCE EM Transect, Marcell Experimental Forest, Grand Rapids, Minnesota, USA   | 47.505 | -93.454 | 418  | SH |
| spruceA0P07S<br>H  | SPRUCE Experiment, Control plot 7, Marcell Experimental Forest, Minnesota, USA  | 47.505 | -93.453 | 413  | SH |
| spruceA0P21S<br>H  | SPRUCE Experiment, Control plot 21, Marcell Experimental Forest, Minnesota, USA | 47.506 | -93.453 | 413  | SH |
| spruceT0P06S<br>H  | Marcell Experimental Forest, north of Grand Rapids, Minnesota, USA              | 47.505 | -93.454 | 410  | SH |
| spruceT0P19E<br>SH | Marcell Experimental Forest, north of Grand Rapids, Minnesota, USA              | 47.507 | -93.454 | 410  | SH |
| spruceT2P11E<br>SH | Marcell Experimental Forest, north of Grand Rapids, Minnesota, USA              | 47.505 | -93.453 | 410  | SH |
| spruceT2P20S<br>H  | Marcell Experimental Forest, north of Grand Rapids, Minnesota, USA              | 47.506 | -93.453 | 410  | SH |



|                    |                                                                                             |        |          |      |    |
|--------------------|---------------------------------------------------------------------------------------------|--------|----------|------|----|
| spruceT4P04E<br>SH | Marcell Experimental Forest,<br>north of Grand Rapids,<br>Minnesota, USA                    | 47.505 | -93.454  | 410  | SH |
| spruceT4P13S<br>H  | Marcell Experimental Forest,<br>north of Grand Rapids,<br>Minnesota, USA                    | 47.506 | -93.453  | 410  | SH |
| spruceT6P08S<br>H  | Marcell Experimental Forest,<br>north of Grand Rapids,<br>Minnesota, USA                    | 47.506 | -93.454  | 410  | SH |
| spruceT6P16E<br>SH | Marcell Experimental Forest,<br>north of Grand Rapids,<br>Minnesota, USA                    | 47.506 | -93.453  | 410  | SH |
| spruceT9P10E<br>SH | Marcell Experimental Forest,<br>north of Grand Rapids,<br>Minnesota, USA                    | 47.505 | -93.453  | 410  | SH |
| spruceT9P17S<br>H  | Marcell Experimental Forest,<br>north of Grand Rapids,<br>Minnesota, USA                    | 47.506 | -93.453  | 410  | SH |
| stjones            | St. Jones Estuarine Research<br>Reserve, Dover, Delaware                                    | 39.088 | -75.437  | 2    | GR |
| sylvania           | Sylvania Wilderness,<br>Wisconsin                                                           | 46.242 | -89.348  | 540  | DB |
| teddy              | Painted Canyon Visitor<br>Center, Teddy Roosevelt<br>National Park, North Dakota            | 46.895 | -103.378 | 853  | GR |
| torgnon-nd         | Torgnon Research Site<br>(Alpine grassland site),<br>Torgnon, Italy                         | 45.844 | 7.578    | 2160 | GR |
| torrepalacio       | Doñana marshes from the<br>survey tower located at El<br>Palacio                            | 36.991 | -6.443   | 3    | WL |
| turkeypointdbf     | Mature Deciduous Site,<br>Turkey Point Carbon Cycle<br>Research Project, Ontario,<br>Canada | 42.635 | -80.558  | 211  | DB |
| uiefprairie        | Restored prairie at the<br>University of Illinois Energy<br>Farm, Urbana, IL USA            | 40.065 | -88.198  | 224  | GR |

|                      |                                                                                       |        |         |     |    |
|----------------------|---------------------------------------------------------------------------------------|--------|---------|-----|----|
| umichbiologica<br>12 | FASET Tower, University of<br>Michigan Biological Station,<br>near Pellston, Michigan | 45.563 | -84.698 | 240 | DB |
| willowcreek          | Willow Creek,<br>Chequamegon-Nicolet<br>National Forest, Wisconsin                    | 45.806 | -90.079 | 521 | DB |
| worcester            | Worcester State University,<br>Worcester, Massachusetts                               | 42.270 | -71.843 | 185 | DB |

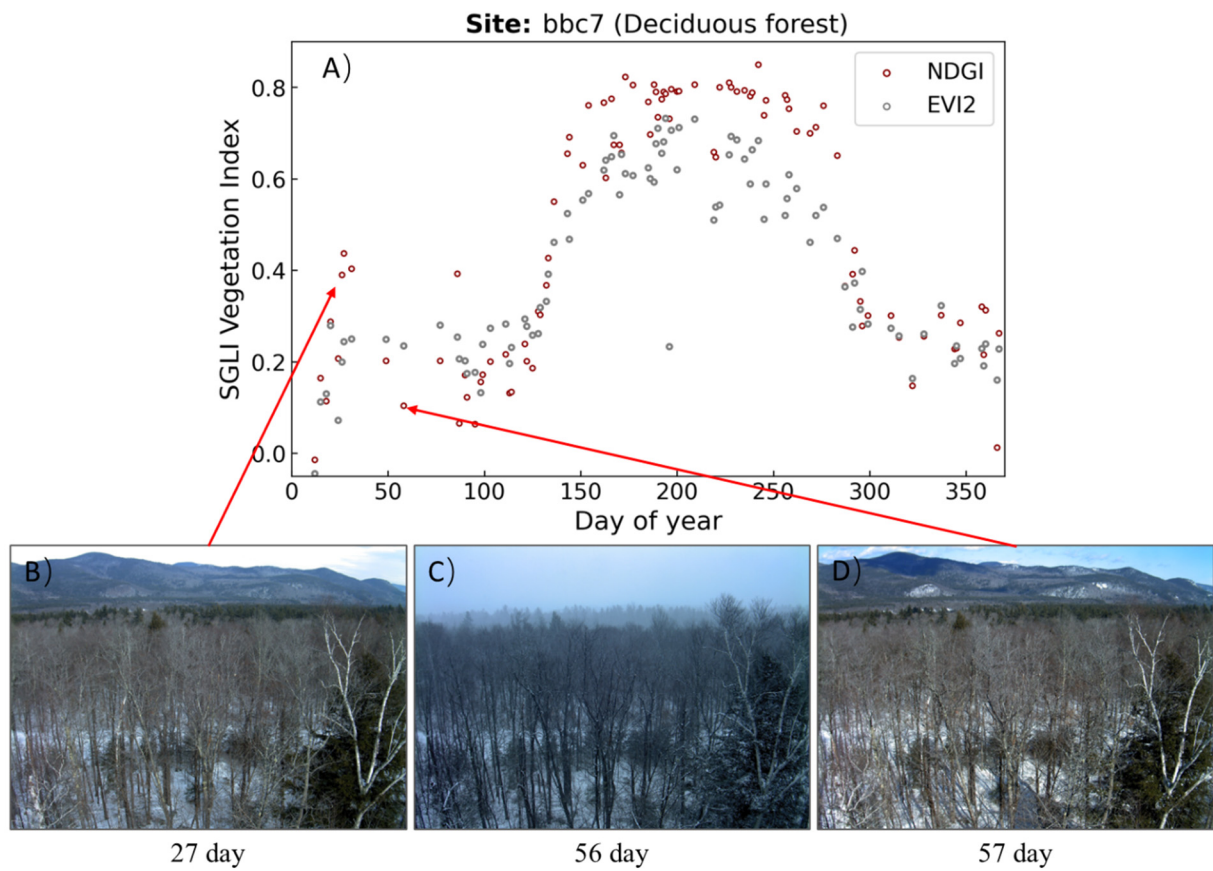

**Figure S1.** Comparison of NDGI and EVI2 time series retrieved from SGLI (A). B, C, and D are digital images from the PhenoCam Network site weather cameras corresponding to surface conditions at 27 days, 56 days, and 57 days, respectively.

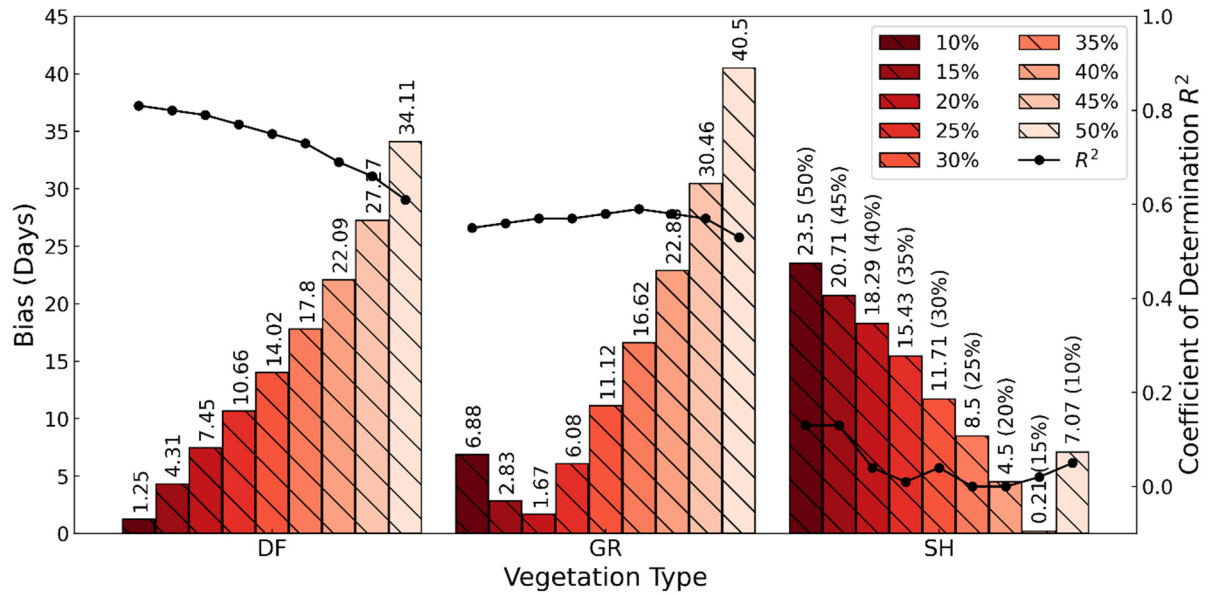

**Figure S2.** Bias and coefficient of determination between dormancy dates derived from SGLI and near-surface observation. Results are separated according to vegetation type (DF: deciduous forest; GR: grassland, SH: shrub). Progressively darker shades of red are used to designate dormancy dates corresponding to different thresholds (10% to 50% of threshold by 5% step).
